# Supplementary material for: Zinc- and Copper-Loaded Nanosponges from Cellulose Nanofibers Hydrogels: New Heterogeneous Catalysts for the Synthesis of Aromatic Acetals
Source: MDPI journal article supplement (doi:10.3390/gels8010054), 2022-01-12
Supplement: s1 [file s1]

Supplementary

# Zinc- and Copper-Loaded Nanosponges from Cellulose Nanofibers Hydrogels: New Heterogeneous Catalysts for the Synthesis of Aromatic Acetals

Laura Riva, Angelo Davide Lotito, Carlo Punta, and Alessandro Sacchetti \*

Department of Chemistry, Materials, and Chemical Engineering “G. Natta” and INSTM Local Unit, Politecnico di Milano, 20131 Milan, Italy; laura2.riva@polimi.it (L.R.); angelodavide.lotito@mail.polimi.it (A.D.L.); carlo.punta@polimi.it (C.P.)

\* Correspondence: alessandro.sacchetti@polimi.it; Tel.: +39-0223993017

## NMR Spectra

NMR of the crude products are here reported. All the spectra were recorded with a 400 MHz Bruker NMR spectrometer. Products have not been purified. The  $^1\text{H}$ -NMR characterization of all products is in agreement with the literature (see references herein reported). Full NMR characterization of new compound **5** is here reported.

|                                                                                              |     |
|----------------------------------------------------------------------------------------------|-----|
| Figure S1: $^1\text{H}$ NMR spectrum of 1-(dimethoxymethyl)-4-fluorobenzene <b>1</b>         | p2  |
| Figure S2: $^1\text{H}$ NMR spectrum of 1-(dimethoxymethyl)-4-methylbenzene <b>3a</b>        | p2  |
| Figure S3: $^1\text{H}$ NMR spectrum of 1-(dimethoxymethyl)-3-methoxybenzene <b>3b</b>       | p3  |
| Figure S4: $^1\text{H}$ NMR spectrum of 1-(dimethoxymethyl)-2-methoxybenzene <b>3c</b>       | p3  |
| Figure S5: $^1\text{H}$ NMR spectrum of 1,1-dimethoxycyclohexane <b>3d</b>                   | p4  |
| Figure S6: $^1\text{H}$ NMR spectrum of 1,1-dimethoxycyclopentane <b>3e</b>                  | p4  |
| Figure S7: $^1\text{H}$ NMR spectrum of 2-(dimethoxymethyl)naphthalene <b>3f</b>             | p5  |
| Figure S8: $^1\text{H}$ NMR spectrum of 2-(dimethoxymethyl)furan <b>3g</b>                   | p5  |
| Figure S9: $^1\text{H}$ NMR spectrum of (dimethoxymethyl)benzene <b>3h</b>                   | p6  |
| Figure S10: $^1\text{H}$ NMR spectrum of 1-chloro-4-(dimethoxymethyl)benzene <b>3i</b>       | p6  |
| Figure S11: $^1\text{H}$ NMR spectrum of 1-(diethoxymethyl)-4-methylbenzene <b>6a</b>        | p7  |
| Figure S12: $^1\text{H}$ NMR spectrum of 1-(diethoxymethyl)-3-methoxybenzene <b>6b</b>       | p7  |
| Figure S13: $^1\text{H}$ NMR spectrum of 1-(diethoxymethyl)-2-methoxybenzene <b>6c</b>       | p8  |
| Figure S14: $^1\text{H}$ NMR spectrum of 1,1-diethoxycyclohexane <b>6d</b>                   | p8  |
| Figure S15: $^1\text{H}$ NMR spectrum of 1,1-diethoxycyclopentane <b>6e</b>                  | p9  |
| Figure S16: $^1\text{H}$ NMR spectrum of 2-(diethoxymethyl)furan <b>6g</b>                   | p9  |
| Figure S17: $^1\text{H}$ NMR spectrum of (diethoxymethyl)benzene <b>6h</b>                   | p10 |
| Figure S18: $^1\text{H}$ NMR spectrum of 1-chloro-4-(diethoxymethyl)benzene <b>6i</b>        | p10 |
| Figure S19: $^1\text{H}$ NMR spectrum of 1-(diethoxymethyl)-4-fluorobenzene <b>5</b>         | p11 |
| Figure S20: $^{13}\text{C}$ -APT NMR spectrum of 1-(diethoxymethyl)-4-fluorobenzene <b>5</b> | p11 |
| Figure S21: $^{13}\text{C}$ NMR spectrum of 1-(diethoxymethyl)-4-fluorobenzene <b>5</b>      | p12 |
| Figure S22: COSY NMR spectrum of 1-(diethoxymethyl)-4-fluorobenzene <b>5</b>                 | p12 |
| Figure S23: HSQC NMR spectrum of 1-(diethoxymethyl)-4-fluorobenzene <b>5</b>                 | p13 |

**Citation:** Riva, L.; Lotito, A.D.; Punta, C.; Sacchetti, A. Zinc- and Copper-Loaded Nanosponges from Cellulose Nanofibers Hydrogels: New Heterogeneous Catalysts for the Synthesis of Aromatic Acetals. *Gels* **2022**, *8*, 54. <https://doi.org/10.3390/gels8010054>

Academic Editors: Yi Cao

Received: 22 December 2021

Accepted: 10 January 2022

Published: 12 January 2022

**Publisher's Note:** MDPI stays neutral with regard to jurisdictional claims in published maps and institutional affiliations.

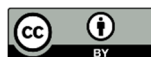

**Copyright:** © 2022 by the authors. Licensee MDPI, Basel, Switzerland. This article is an open access article distributed under the terms and conditions of the Creative Commons Attribution (CC BY) license (<https://creativecommons.org/licenses/by/4.0/>).

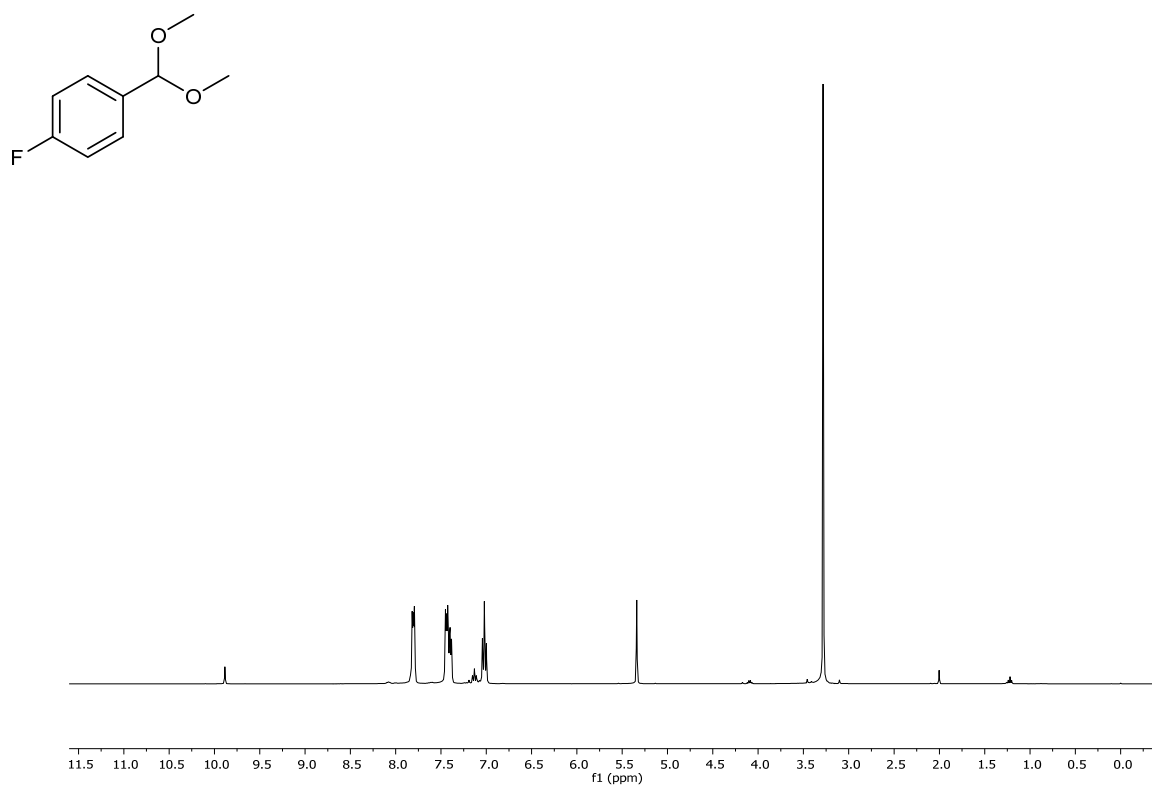

Figure S1. <sup>1</sup>H NMR spectrum of product **1** in CDCl<sub>3</sub> [1].

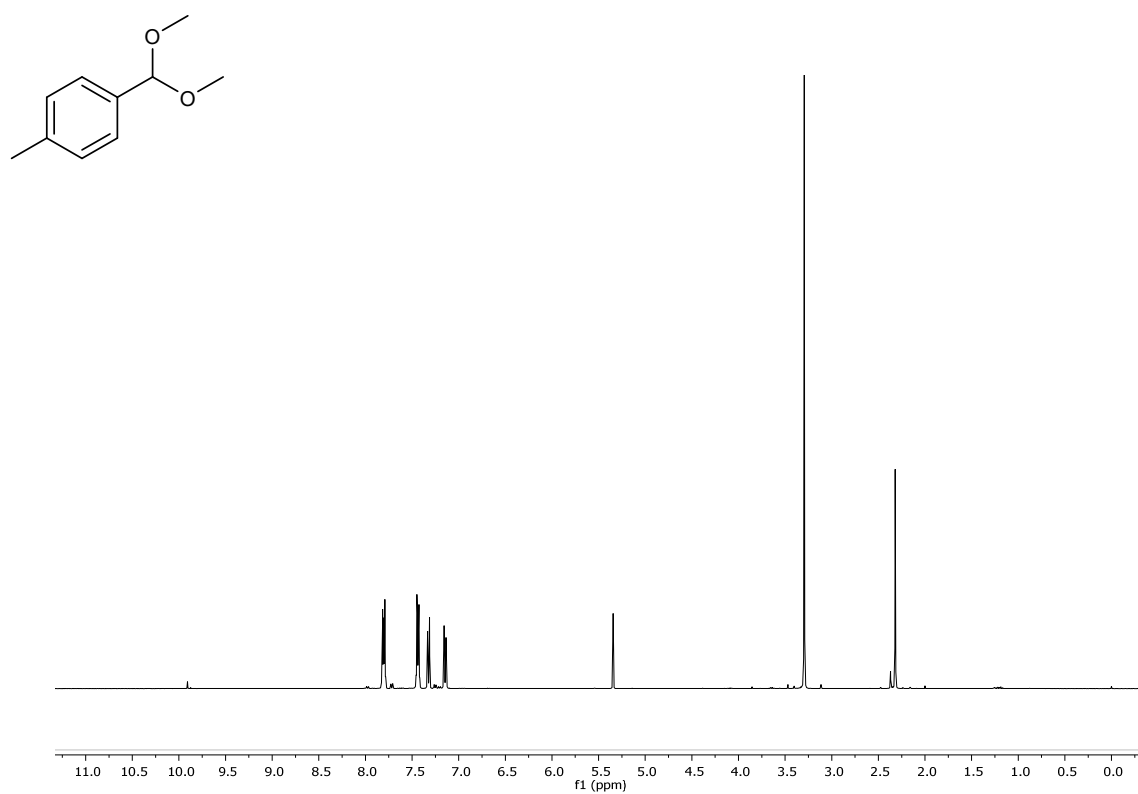

Figure S2. <sup>1</sup>H NMR spectrum of product **3a** in CDCl<sub>3</sub> [1].

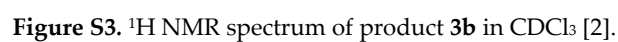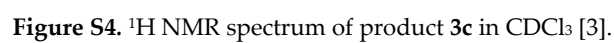

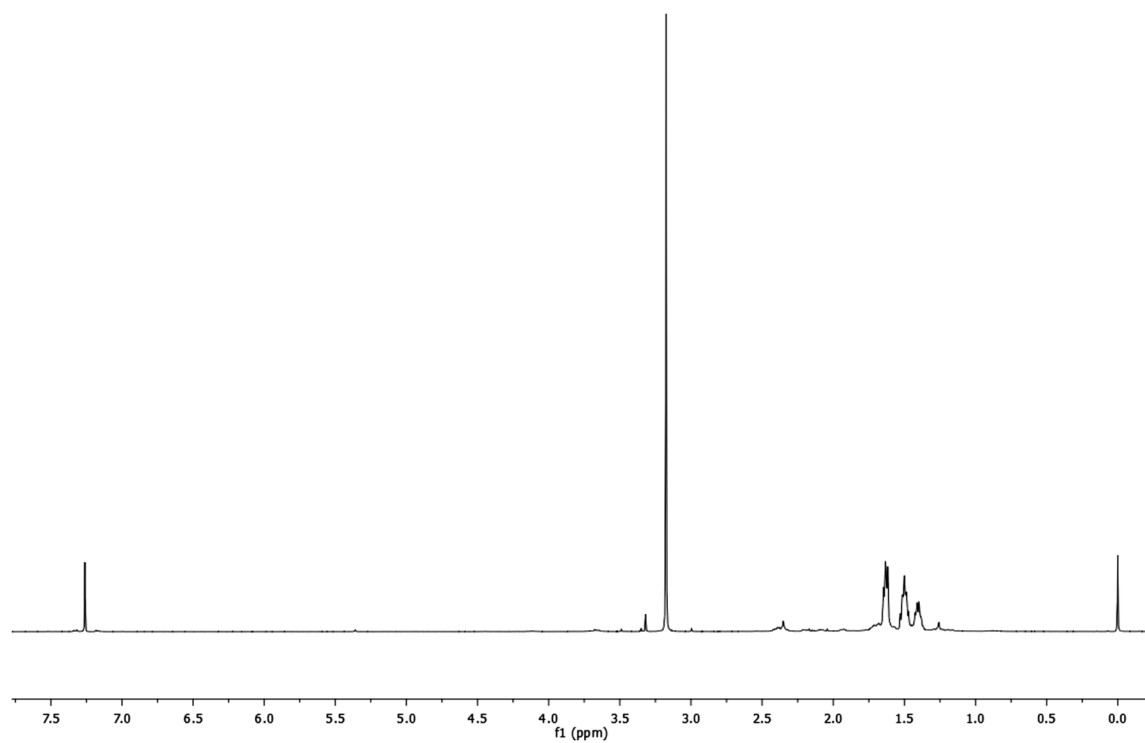

**Figure S5.**  $^1\text{H}$  NMR spectrum of product **3d** in  $\text{CDCl}_3$  [4].

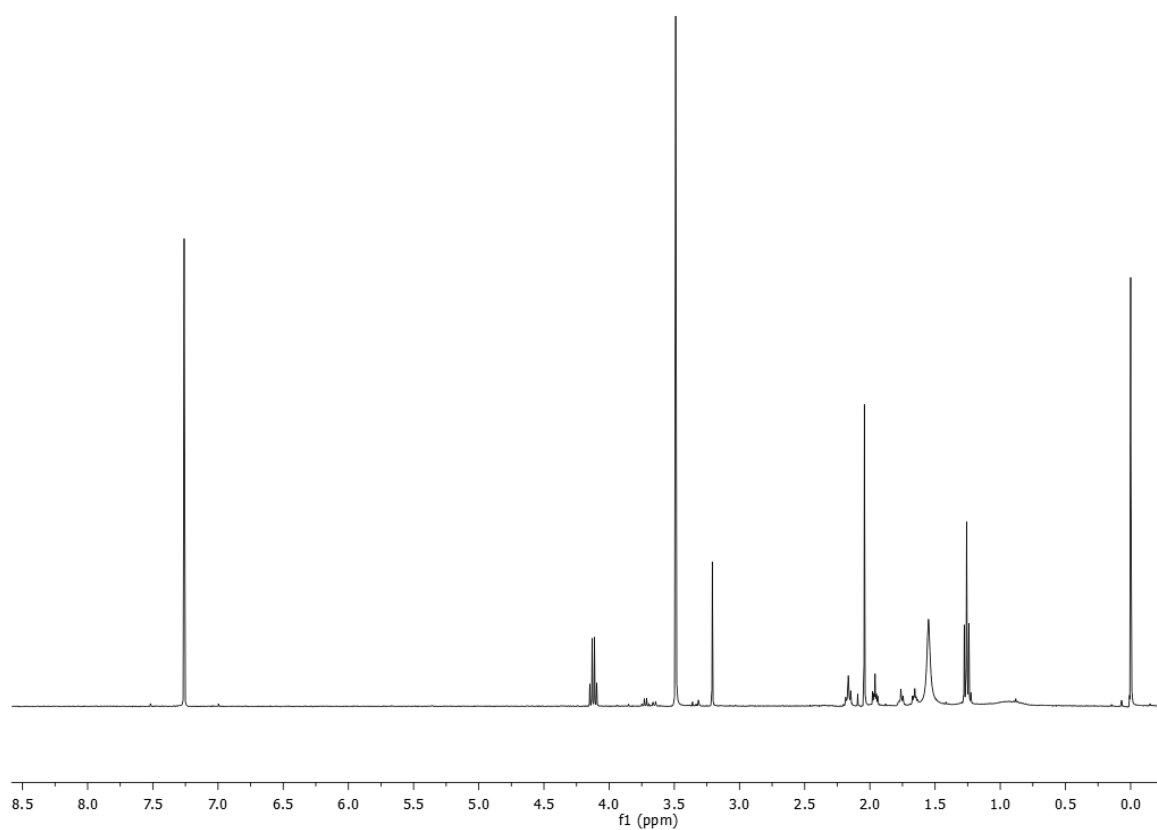

**Figure S6.**  $^1\text{H}$  NMR spectrum of product **3e** in  $\text{CDCl}_3$  [5].

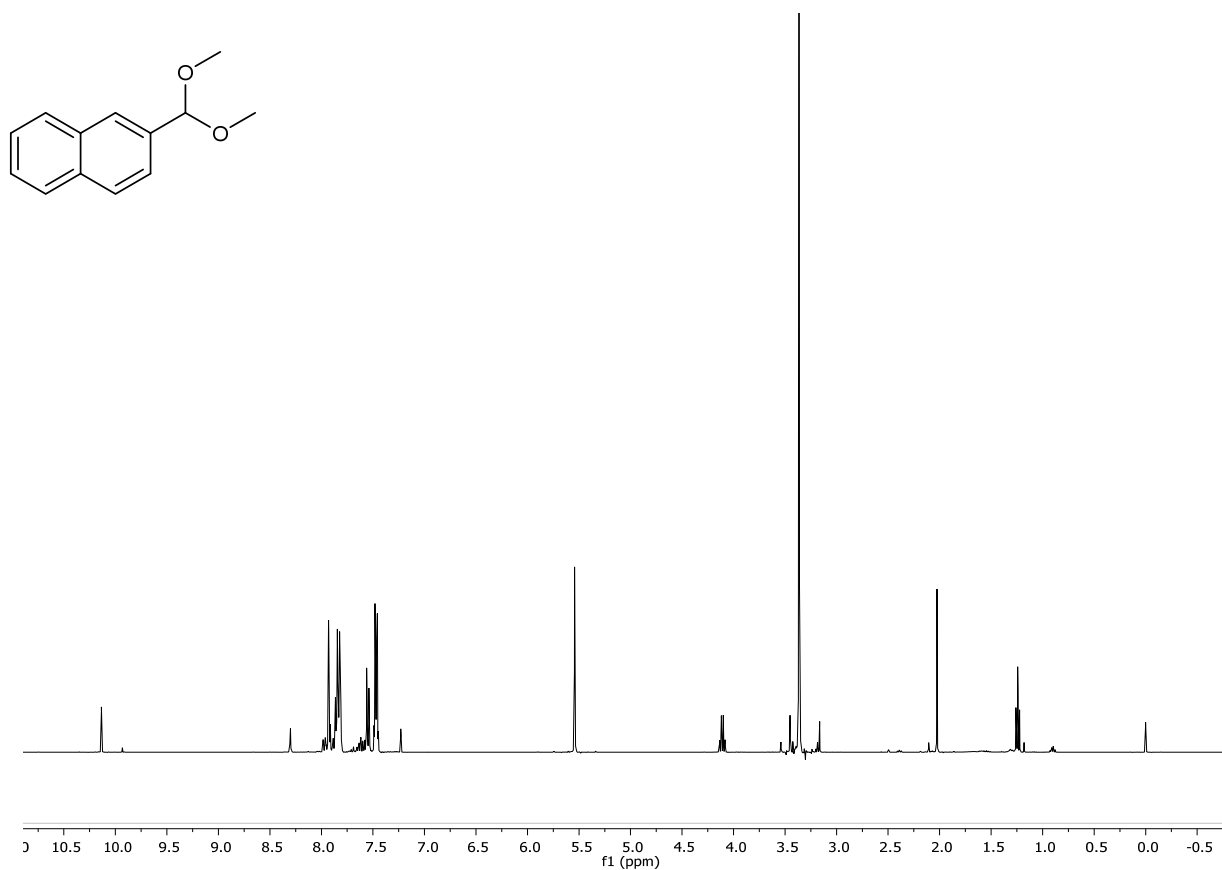

**Figure S7.**  $^1\text{H}$  NMR spectrum of product **3f** in  $\text{CDCl}_3$  [6].

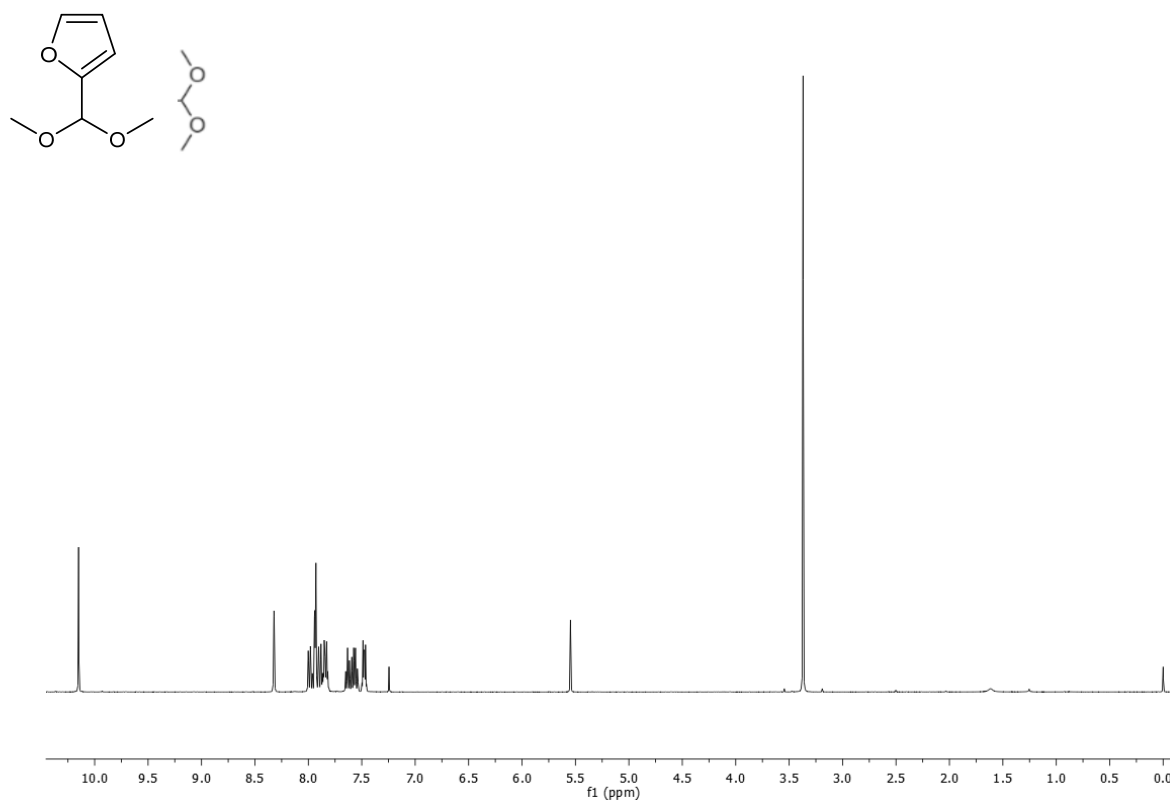

**Figure S8.**  $^1\text{H}$  NMR spectrum of product **3g** in  $\text{CDCl}_3$  [7].

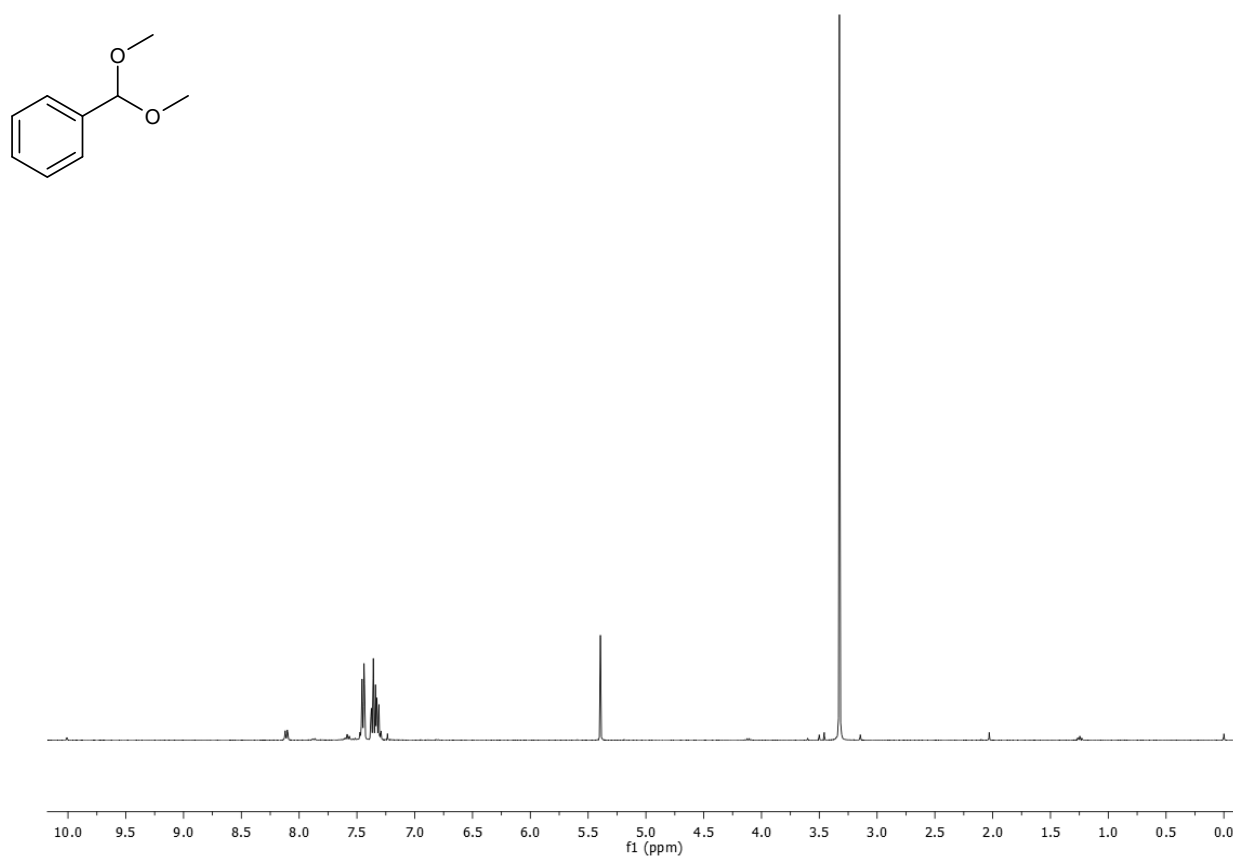

**Figure S9.**  $^1\text{H}$  NMR spectrum of product **3h** in  $\text{CDCl}_3$  [7].

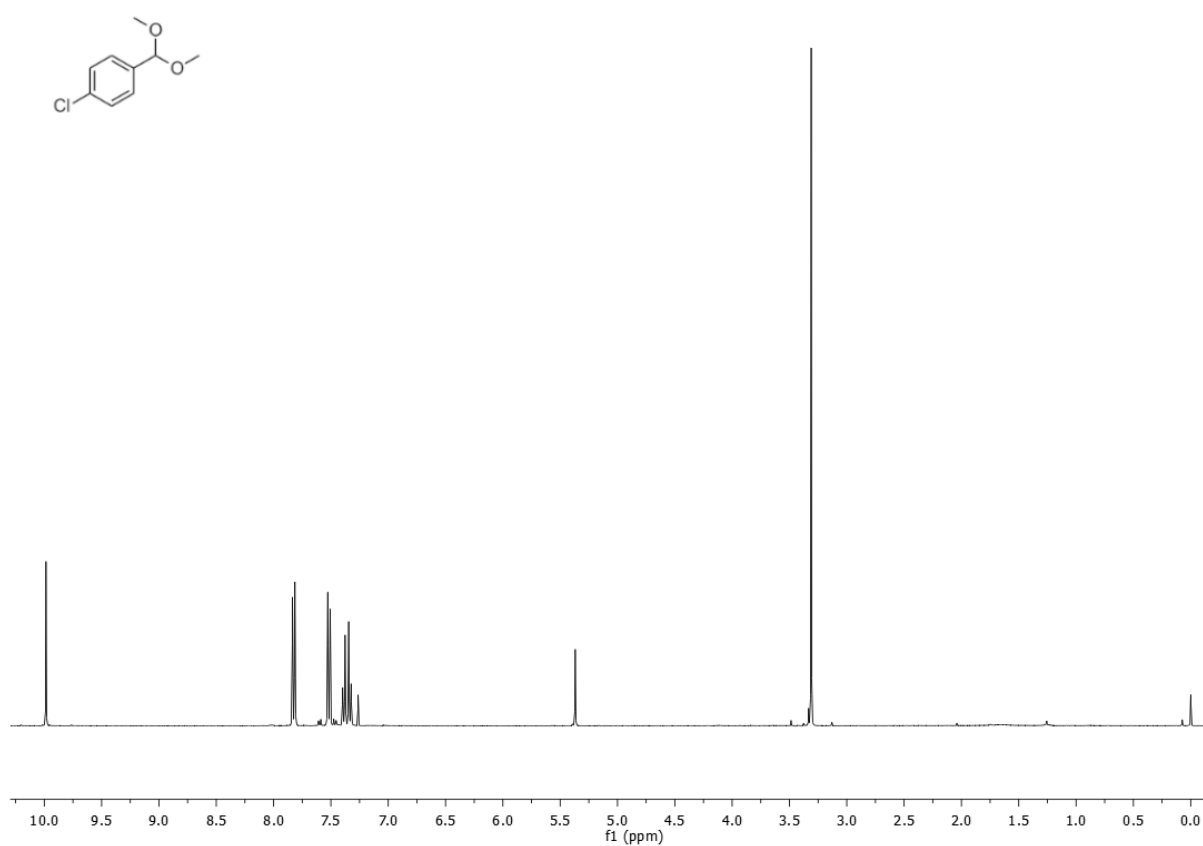

**Figure S10.**  $^1\text{H}$  NMR spectrum of product **3i** in  $\text{CDCl}_3$  [1].

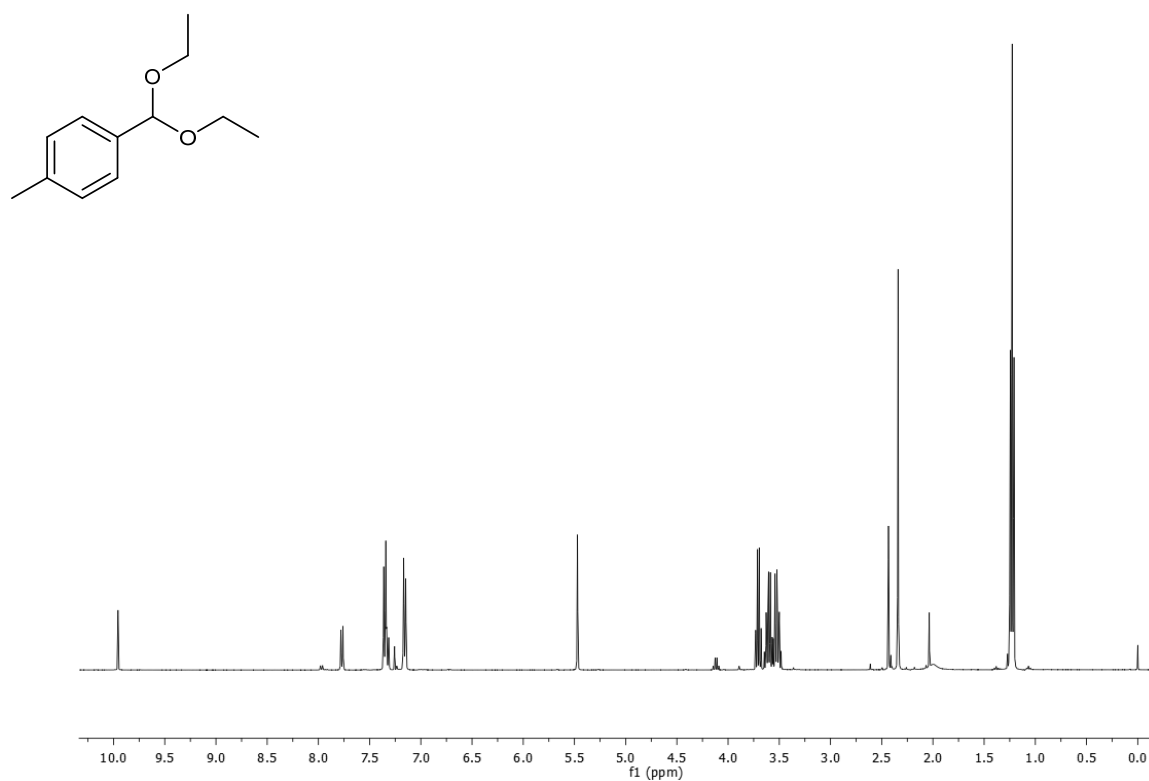

**Figure S11.**  $^1\text{H}$  NMR spectrum of product **6a** in  $\text{CDCl}_3$  [8].

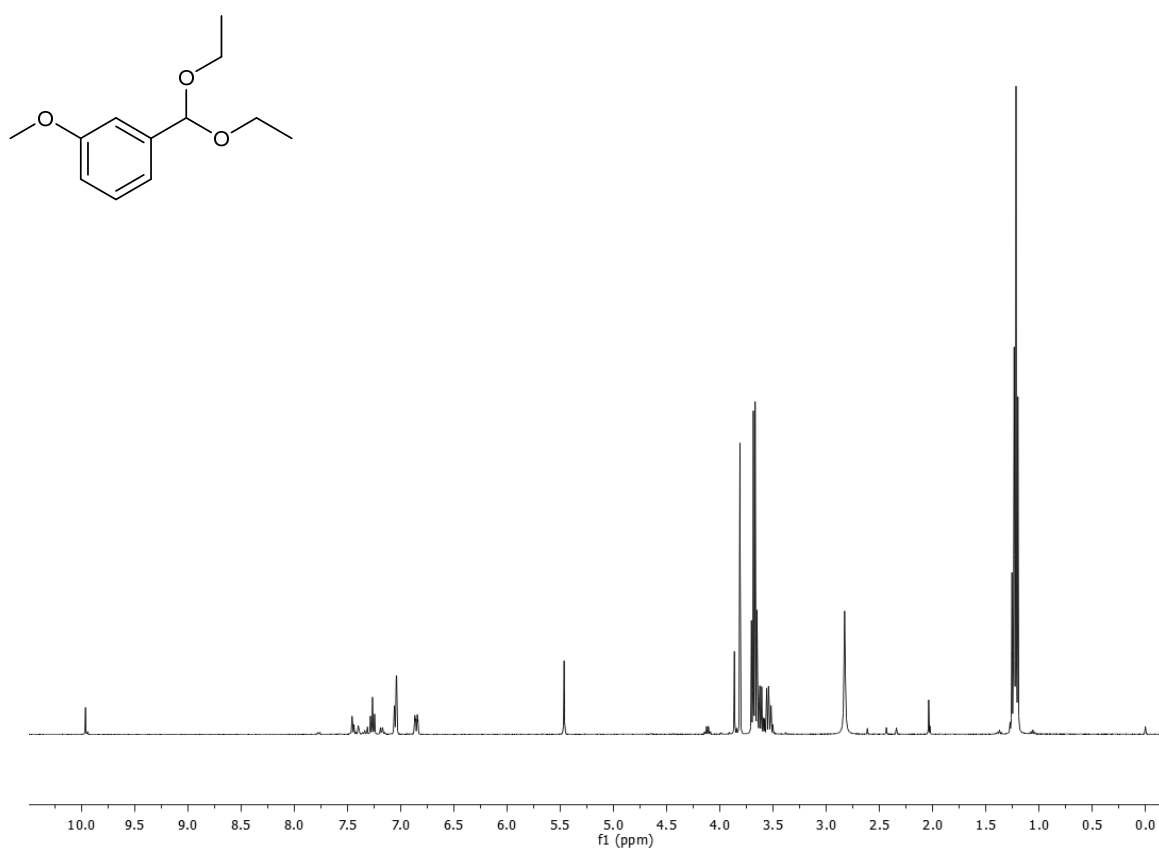

**Figure S12.**  $^1\text{H}$  NMR spectrum of product **6b** in  $\text{CDCl}_3$  [9].

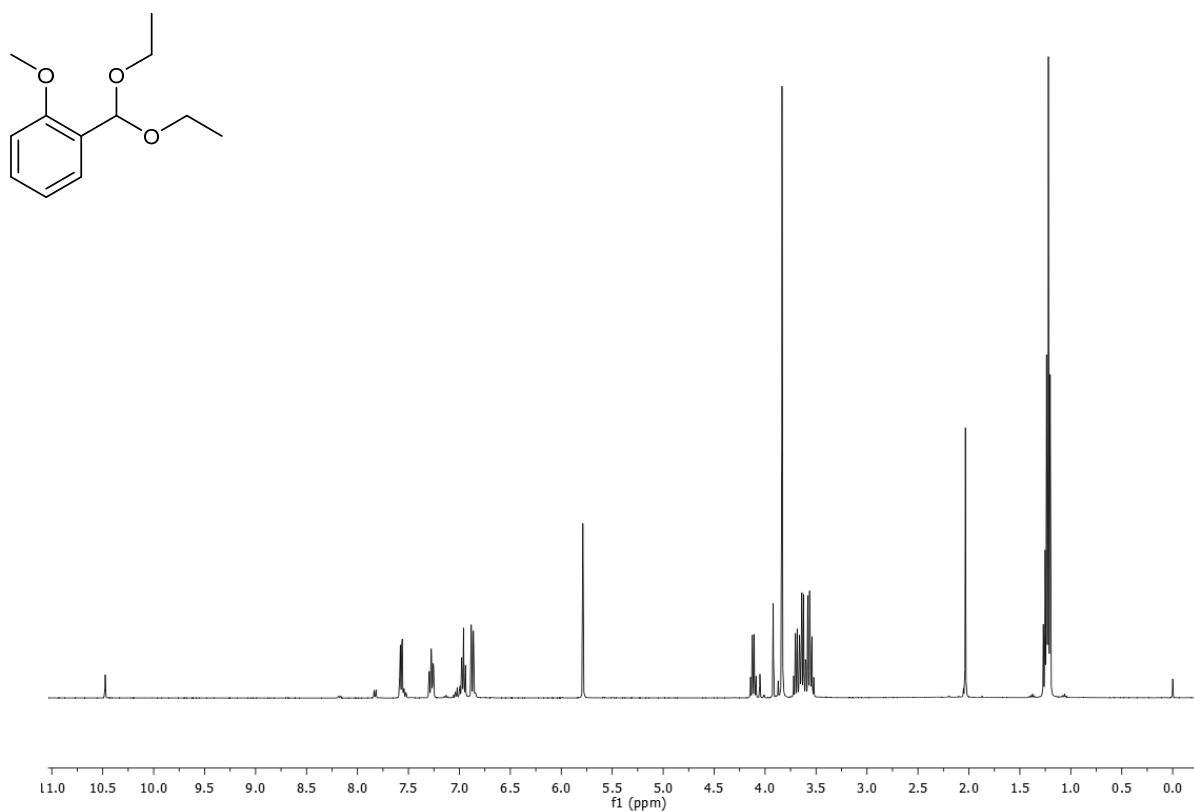

**Figure S13.**  $^1\text{H}$  NMR spectrum of product **6c** in  $\text{CDCl}_3$  [9].-

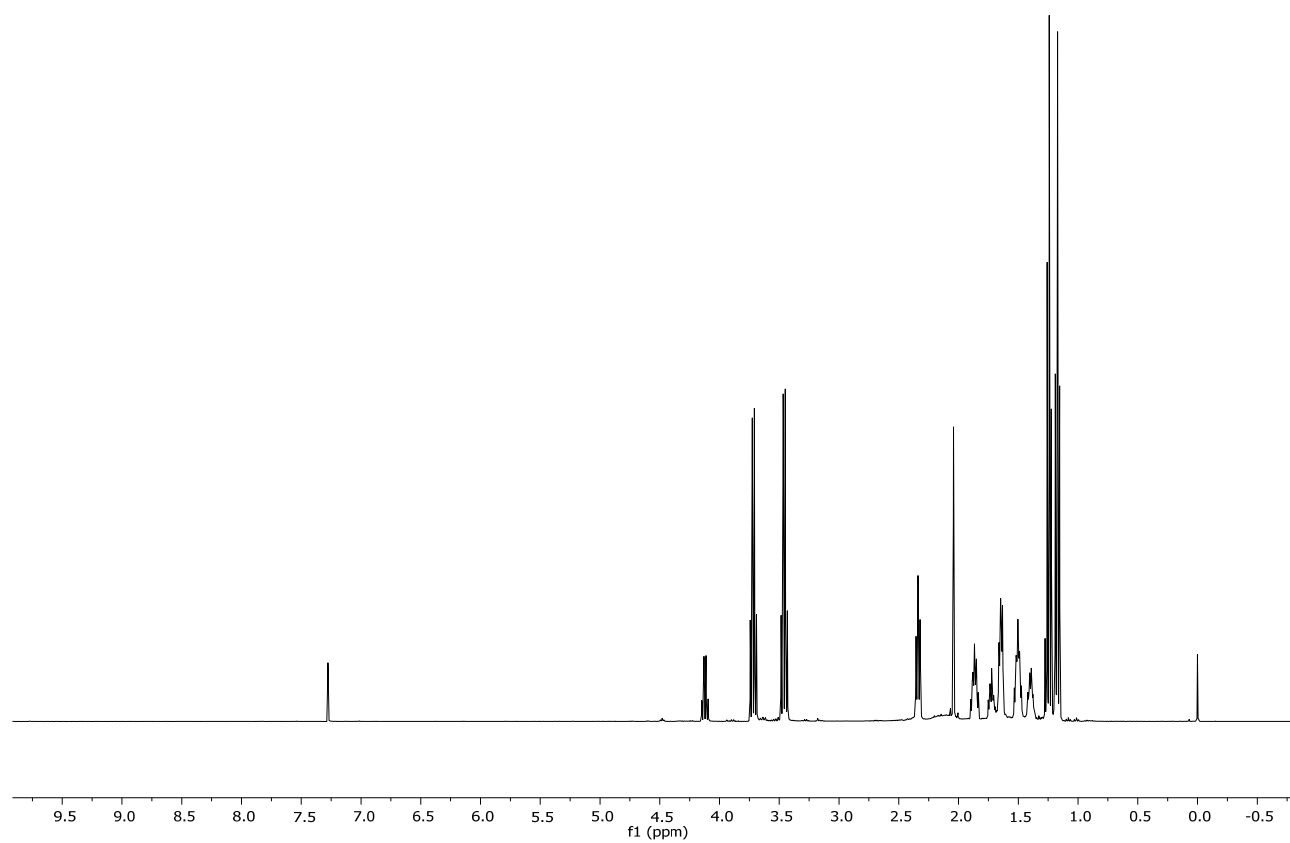

**Figure S14.**  $^1\text{H}$  NMR spectrum of product **6d** in  $\text{CDCl}_3$  [8].



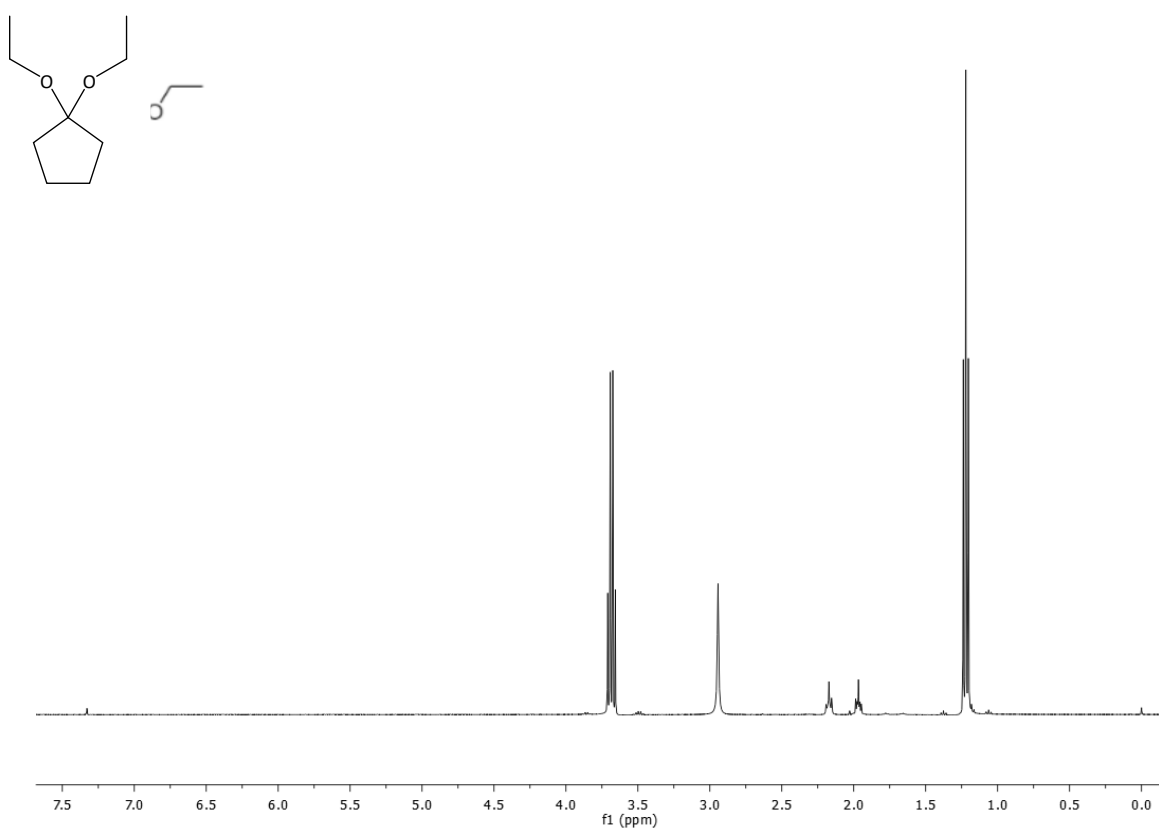

**Figure S15.** <sup>1</sup>H NMR spectrum of product **6e** in CDCl<sub>3</sub> [10].

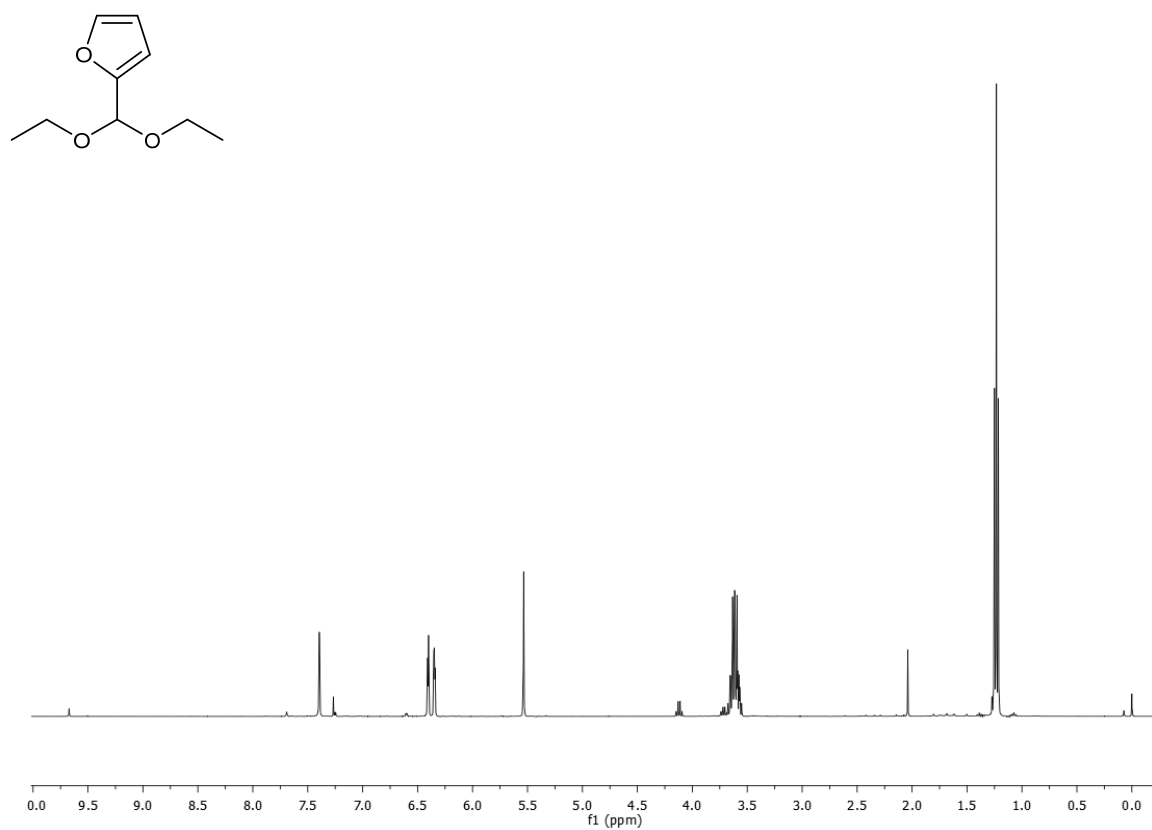

**Figure S16.** <sup>1</sup>H NMR spectrum of product **6g** in CDCl<sub>3</sub> [11].

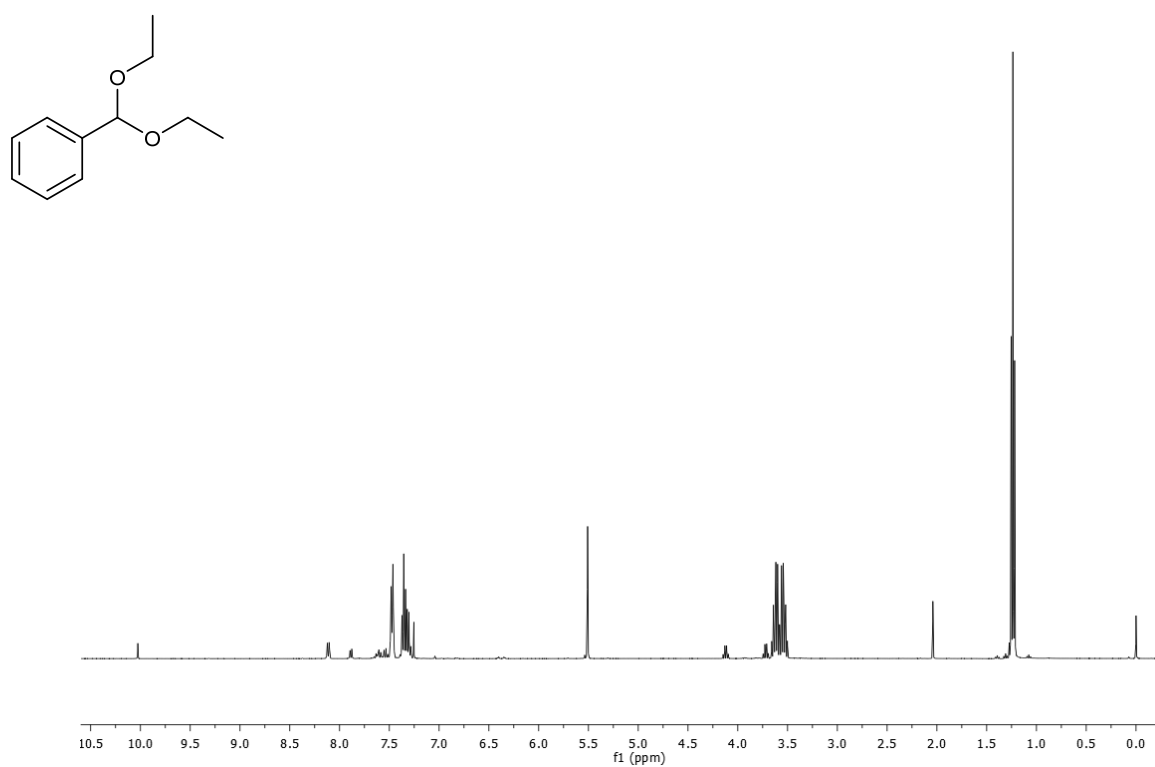

**Figure S17.** <sup>1</sup>H NMR spectrum of product **6h** in CDCl<sub>3</sub> [8].

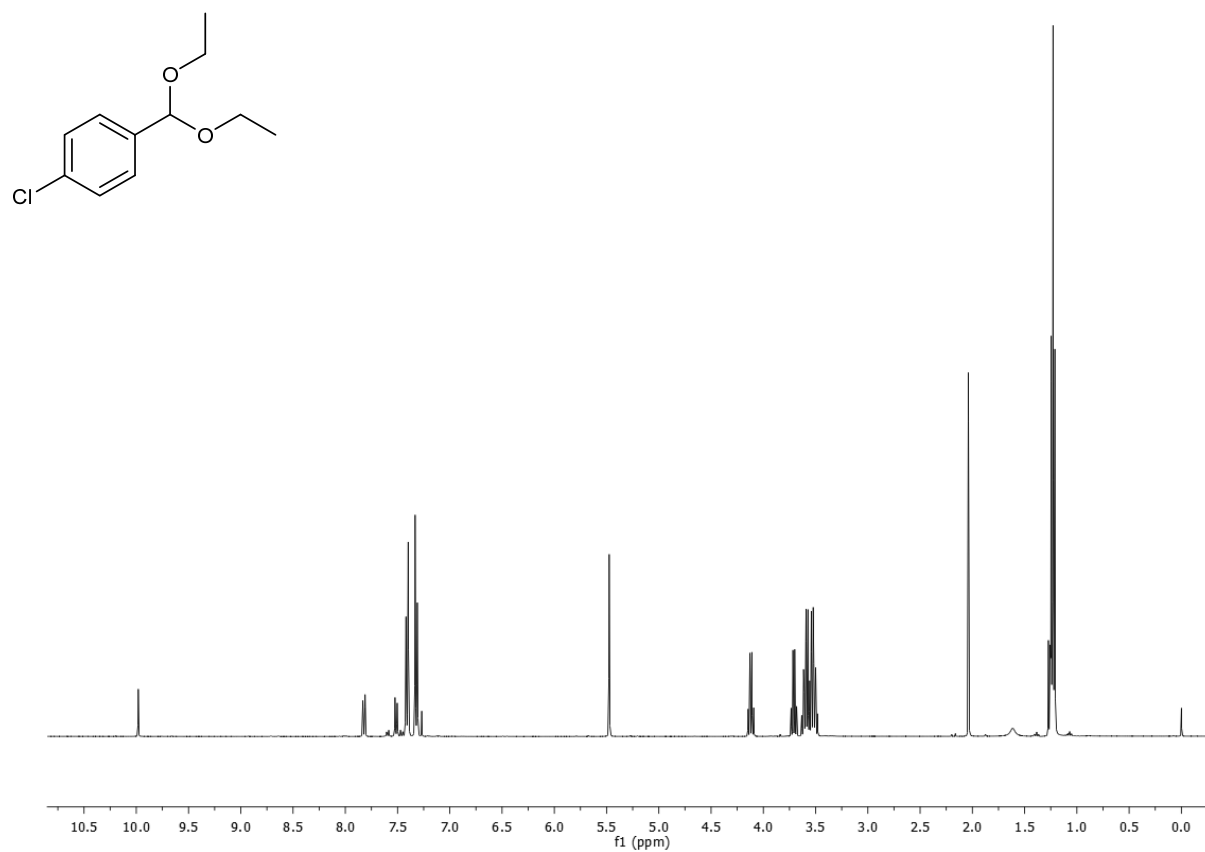

**Figure S18.** <sup>1</sup>H NMR spectrum of product **6i** in CDCl<sub>3</sub> [12].

The reaction product obtained reacting *p*-F-Benzaldehyde and ethanol (product **5**) is not characterized in literature. Isolation and complete characterization were carried out through NMR analysis. Below, complete NMR characterization of product **5** is reported.

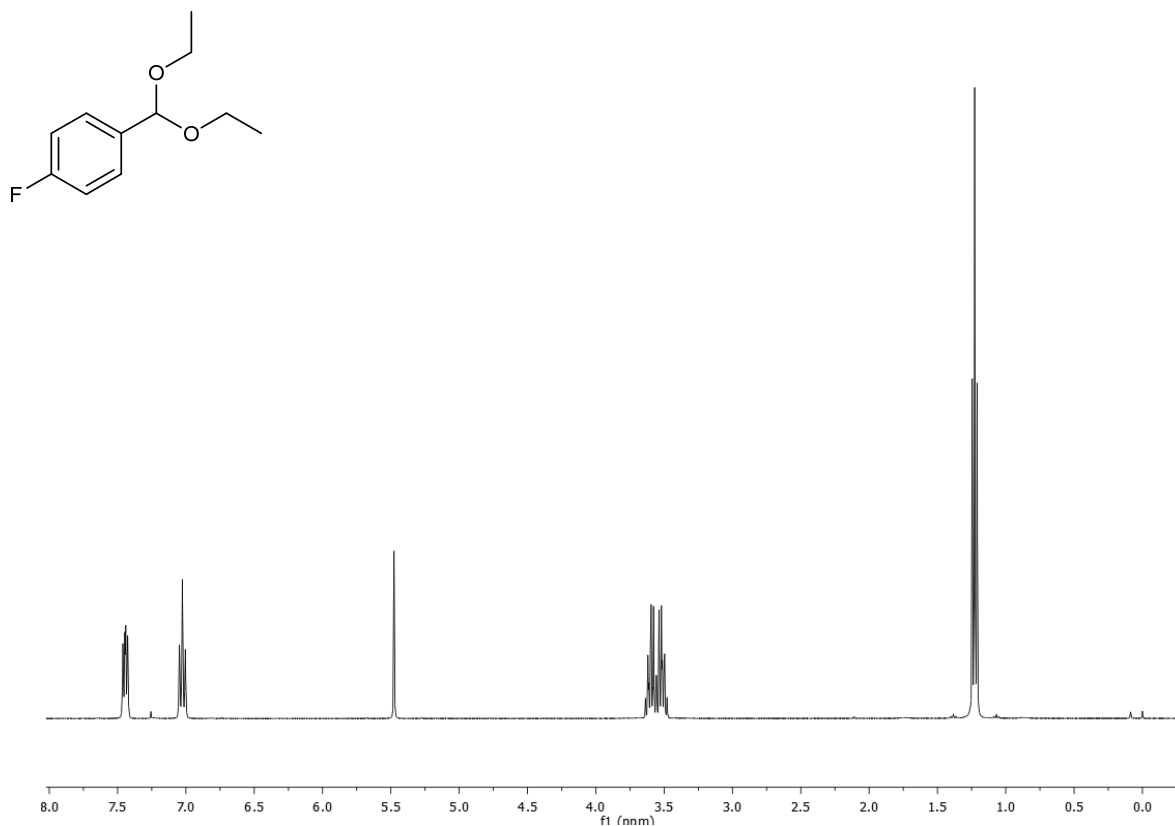

**Figure S19.** <sup>1</sup>H NMR spectrum of product **5** in CDCl<sub>3</sub>.

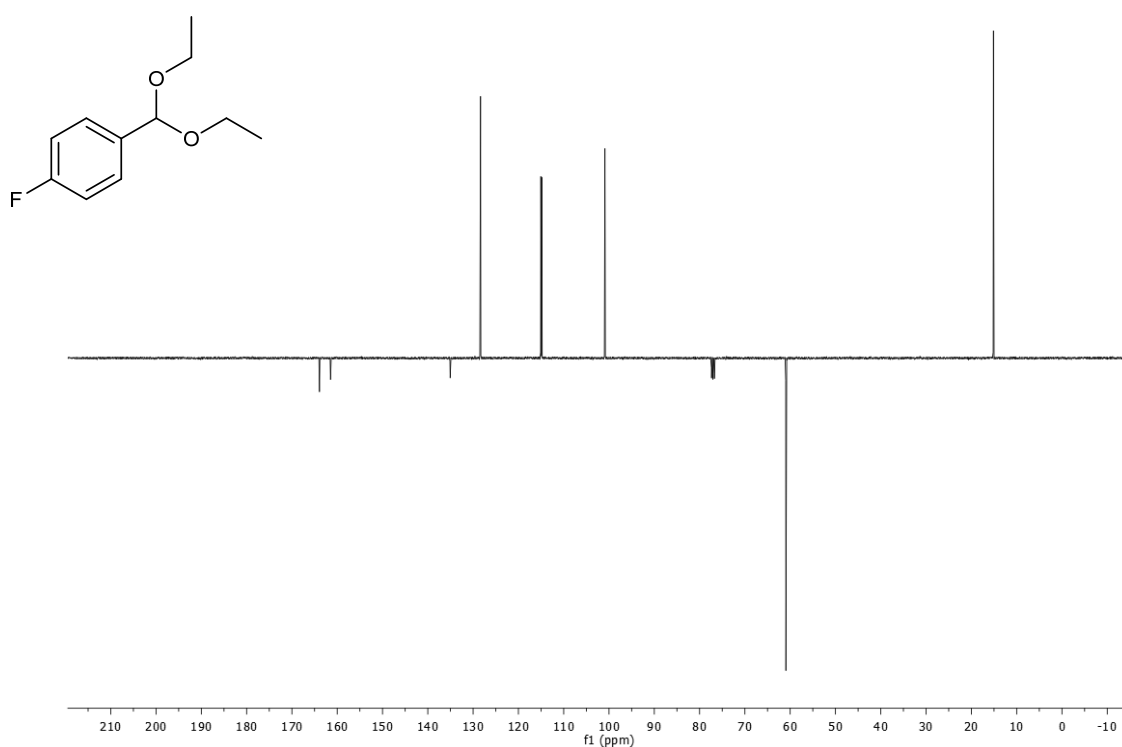

**Figure S20.** <sup>13</sup>C-APT NMR spectrum of product **5** in CDCl<sub>3</sub>.

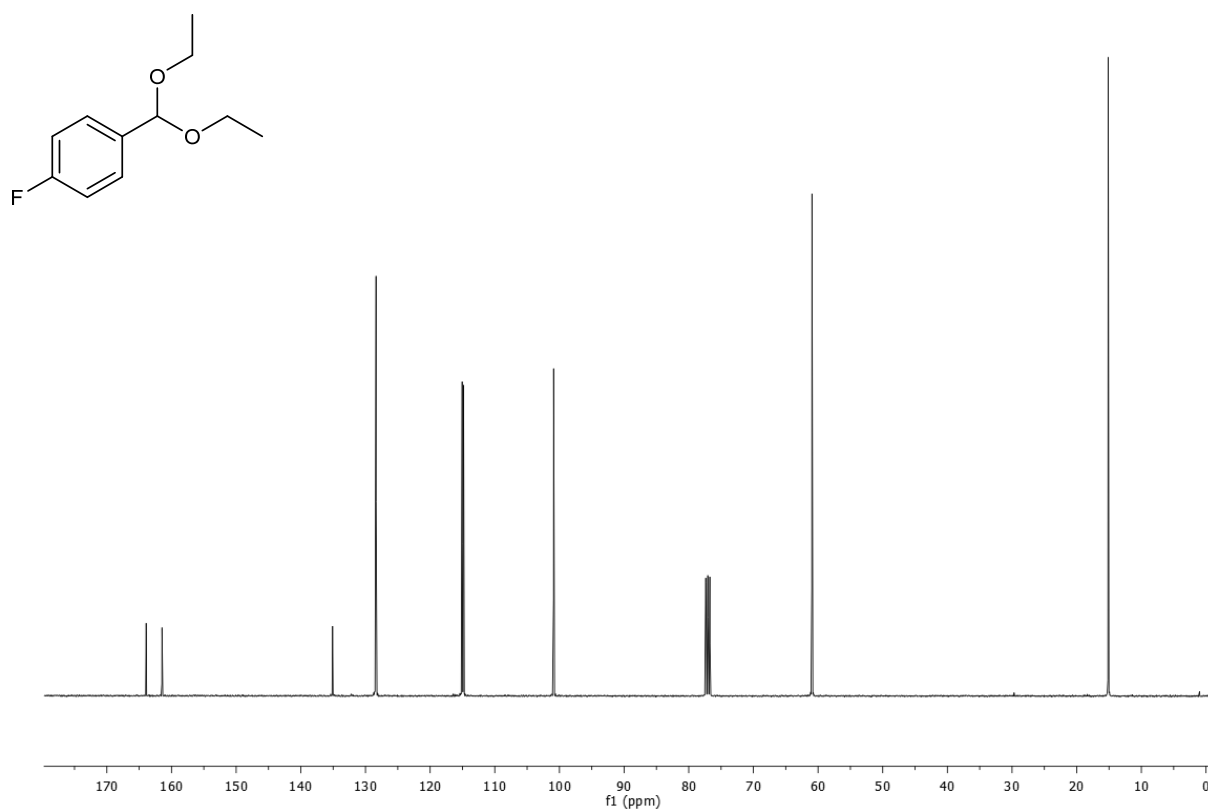

Figure S21.  $^{13}\text{C}$  NMR spectrum of product 5 in  $\text{CDCl}_3$ .

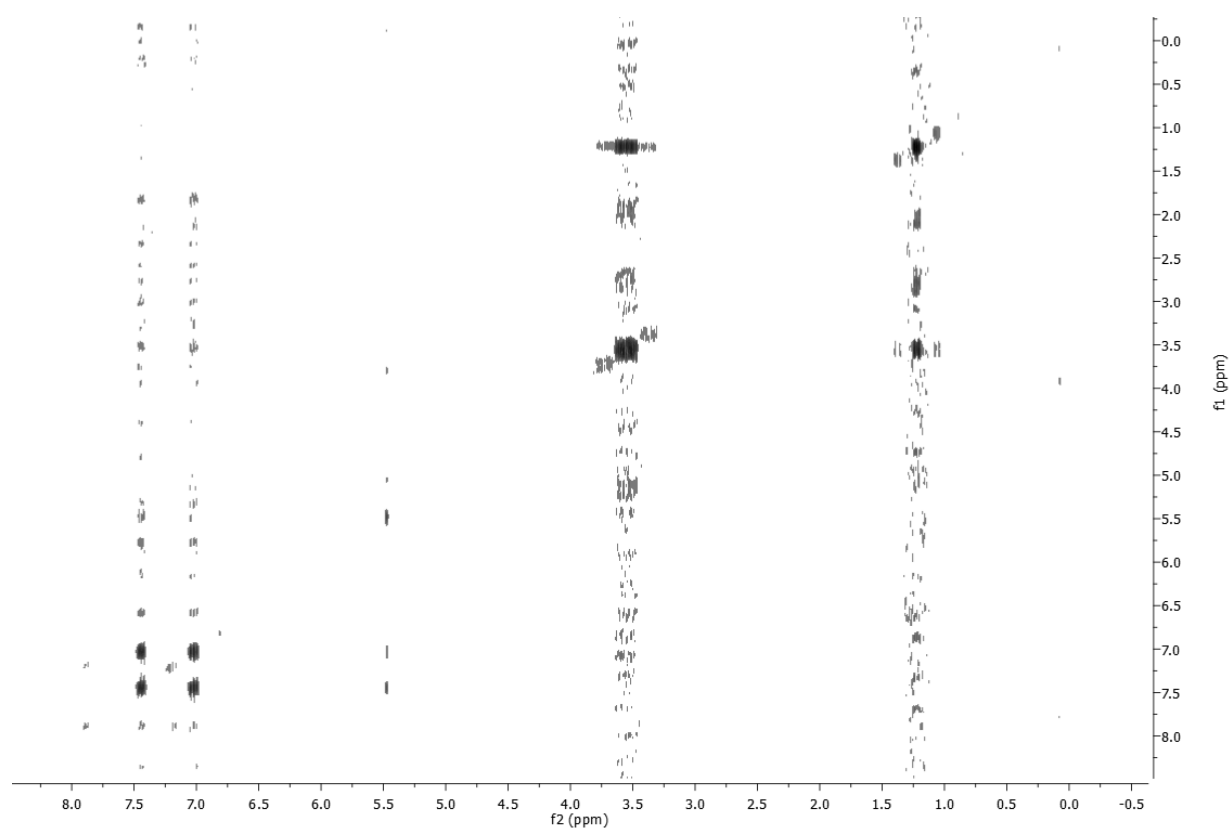

Figure S22. COSY NMR spectrum of product 5 in  $\text{CDCl}_3$ .

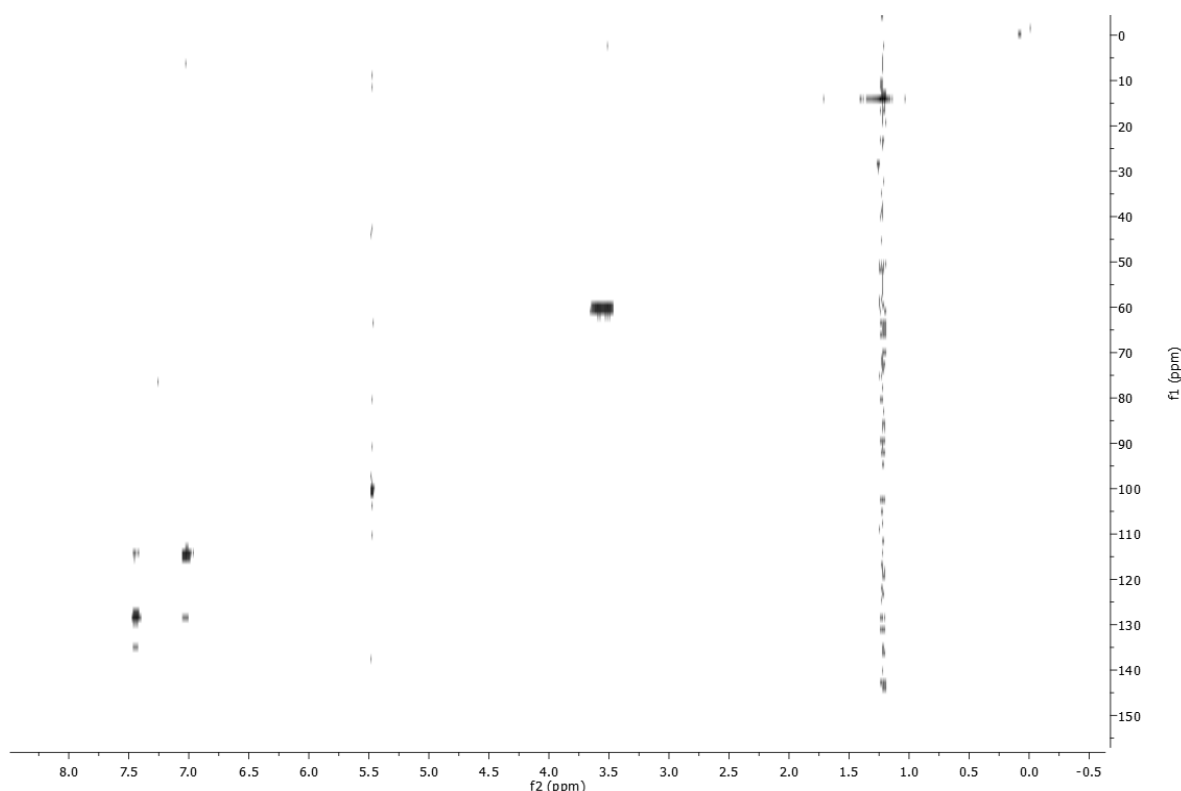

Figure S23. HSQC NMR spectrum of product **5** in CDCl<sub>3</sub>.

## References

1. Wilk, M.; Trzepizur, D.; Koszelewski, D.; Brodzka, A.; Ostaszewski, R. Synthesis of (E)- $\alpha,\beta$ -unsaturated carboxylic esters derivatives from cyanoacetic acid via promiscuous enzyme-promoted cascade esterification/Knoevenagel reaction. *Bioorg. Chem.* **2019**, doi:10.1016/j.bioorg.2019.02.041.
2. Emsermann, J.; Opatz, T. Photochemical Approaches to the Bilobalide Core. *European J. Org. Chem.* **2017**, doi:10.1002/ejoc.201700461.
3. Xavier, T.; Rayapin, C.; Le Gall, E.; Presset, M. Multicomponent Aromatic and Benzylic Mannich Reactions through C–H Bond Activation. *Chem. - A Eur. J.* **2019**, doi:10.1002/chem.201903414.
4. Spiliopoulou, N.; Nikitas, N.F.; Kokotos, C.G. Photochemical synthesis of acetals utilizing Schreiner's thiourea as the catalyst. *Green Chem.* **2020**, doi:10.1039/d0gc01135e.
5. Baxter, M.; Bolshan, Y. A General Access to Propargylic Ethers through Brønsted Acid Catalyzed Alkynylation of Acetals and Ketals with Trifluoroborates. *Chem. - A Eur. J.* **2015**, doi:10.1002/chem.201502797.
6. Lan, J.; Jiang, G.; Yang, J.; Zhu, H.; Le, Z.; Xie, Z.  $\alpha$ -Chymotrypsin-Induced Acetalization of Aldehydes and Ketones with Alcohols. *Synth.* **2020**, doi:10.1055/s-0039-1690883.
7. Subaramanian, M.; Landge, V.G.; Mondal, A.; Gupta, V.; Balaraman, E. Nickel-Catalyzed Chemoselective Acetalization of Aldehydes With Alcohols under Neutral Conditions. *Chem. - An Asian J.* **2019**, doi:10.1002/asia.201900908.
8. Ugarte, R.A.; Hudnall, T.W. Antimony(v) catalyzed acetalisation of aldehydes: An efficient, solvent-free, and recyclable process. *Green Chem.* **2017**, doi:10.1039/c6gc03629e.
9. Maegawa, T.; Otake, K.; Goto, A.; Fujioka, H. Direct conversion of acetals to esters with high regioselectivity via O,P-acetals. *Org. Biomol. Chem.* **2011**, doi:10.1039/c1ob05687e.
10. Silverman, R.B.; Ding, C.Z.; Silverman, R.B.; Ding, C.Z. Chemical Model for a Mechanism of Inactivation of Monoamine Oxidase by Heterocyclic Compounds. Electronic Effects on Acetal Hydrolysis. *J. Am. Chem. Soc.* **1993**, doi:10.1021/ja00064a020.
11. Mensah, E.A.; Green, S.D.; West, J.; Kindoll, T.; Lazaro-Martinez, B. Formation of Acetals and Ketals from Carbonyl Compounds: A New and Highly Efficient Method Inspired by Cationic Palladium. *Synlett* **2019**, doi:10.1055/s-0039-1690497.
12. Du, Y.; Tian, F. Brønsted acidic ionic liquids as efficient and recyclable catalysts for protection of carbonyls to acetals and ketals under mild conditions. *Synth. Commun.* **2005**, doi:10.1080/00397910500214409.
